# Supplementary material for: Green ammonia synthesis from stationary NOx emission sources on a catalytic lean NOx trap
Source: Royal Society of Chemistry journal article supplement (doi:10.1039/d3gc04432g), 2024-01-01
Supplement: d3gc04432g1.pdf [file d3gc04432g1.pdf]

# Supplementary information

## Green Ammonia Synthesis from Stationary NO<sub>x</sub> Emission Sources on Catalytic Lean NO<sub>x</sub> Trap

Frea Van Steenweghen, Lander Hollevoet and Johan A. Martens\*

### Section 1: Experimental work on Lean NO<sub>x</sub> Trap

#### Catalyst preparation and characterization

The LNT catalyst is composed of Pt/Ba/Al<sub>2</sub>O<sub>3</sub> with a nominal weight ratio of 1/20/100.  $\gamma$ -Al<sub>2</sub>O<sub>3</sub> pellets (Alfa Aesar) were crushed and sieved. The particle fraction of 125-250  $\mu$ m was calcined for 5 h in air at 500°C. Pt was loaded on the alumina powder by incipient wetness impregnation with an aqueous solution of H<sub>2</sub>PtCl<sub>6</sub>·6H<sub>2</sub>O (Merck, 99.95%). This powder sample was then dried at room temperature for 1h and at 60°C for 1h, and calcinated in air at 550°C for 5 h. After cooling, barium acetate (Merck, 99%) was next loaded by incipient wetness impregnation, followed by the same drying and calcination steps. Finally, the sample was again sieved and the 125-250  $\mu$ m particle fraction was used as LNT catalyst to guarantee optimal plug flow through the catalyst bed.

#### Catalytic tests

NO<sub>x</sub> adsorption-reduction experiments were performed in an automated continuous fixed-bed microreactor with online reaction product analysis. 60 mg of the catalyst sample was loaded into a quartz tube (inner diameter: 4 mm, length: 15 cm) and placed in the microreactor set-up in vertical position. The catalyst bed was supported by a plug of quartz wool. Air liquid supplies following gasses: N<sub>2</sub> ( $\geq 99.999\%$ ), O<sub>2</sub> ( $\geq 99.5\%$ ), NO (5% in He,  $\geq 99.99\%$ ), H<sub>2</sub> ( $\geq 99.999\%$ ). Concentrations of NO, NO<sub>2</sub> and NH<sub>3</sub> in the gas outlet stream were analysed by an ABB AO2020-Limas11HW UV photometer and N<sub>2</sub>O by an ABB AO2020-URAS26 NDIR photometer. A data point is collected each second, providing real-time data. The collected data are processed with MATLAB software. A schematic reactor setup is given by **Figure S1**.

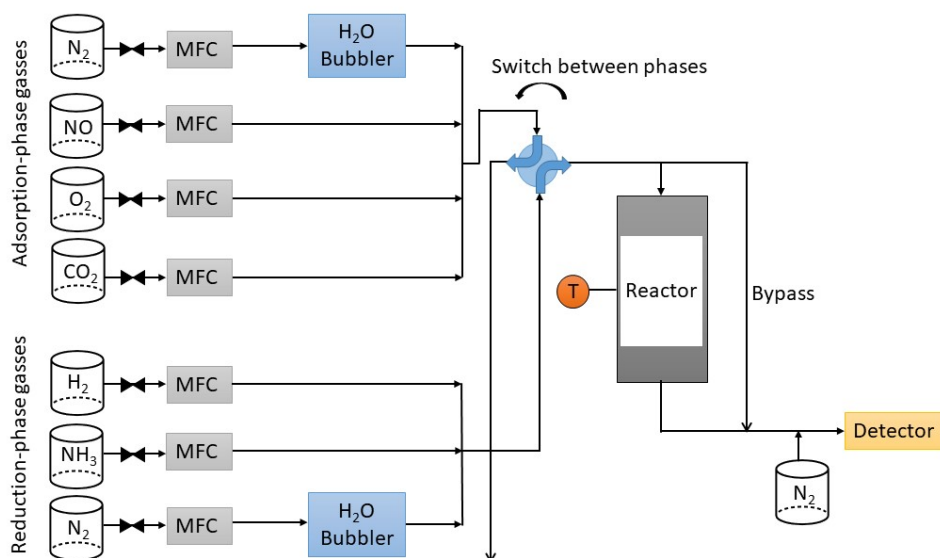

Figure S1: Schematic illustration of the microreactor set-up.

One adsorption-reduction cycle is composed of an adsorption and reduction phase. First, a gas mixture of 200 ppm NO, 5% O<sub>2</sub> and 1.5% H<sub>2</sub>O in N<sub>2</sub> carrier gas was sent over the LNT for 250 s (NO<sub>x</sub> adsorption phase). Second, the reduction of trapped NO<sub>x</sub> was performed by 5% H<sub>2</sub> and the same amount of H<sub>2</sub>O in N<sub>2</sub> carrier gas for 1,800 s (reduction phase). The total gas flow rate was set at 6 L.h<sup>-1</sup>, corresponding to a gas hour space velocity (GHSV) of around 60,000 h<sup>-1</sup>. The test temperature and amount of H<sub>2</sub>O in the gas mixture are indicated in the caption of each figure. Prior to each experimental run, an activation experiment was executed of three adsorption-reduction cycles at 350°C with 1000 ppm NO concentration during adsorption phase.

## Section 2: Results and data processing of testing LNT catalysts

### NO and NH<sub>3</sub> concentration in function of time

In **Figure S2**, the detected NH<sub>3</sub> and NO concentration are plotted in function of time for three cycles of adsorption and reduction. The NH<sub>3</sub> peak occurs at the beginning of the reduction phase and is around 900 ppm high. In each cycle the peak is comparable, meaning that the test is reproducible. Almost no NO is detected at the outlet, which means that all NO is trapped and converted on the LNT.

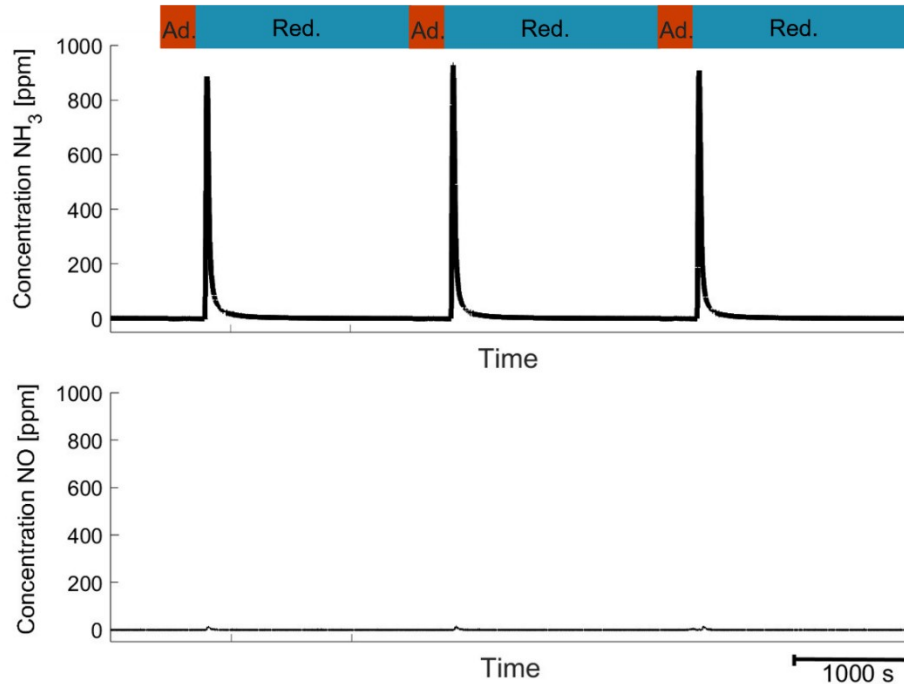

**Figure S2:** NH<sub>3</sub> and NO concentration [ppm] in function of time for three adsorption-reduction cycles (250 s/1800 s) with 4.2% H<sub>2</sub>O at 125°C with an LNT catalyst (Pt/Ba/Al<sub>2</sub>O<sub>3</sub>, 1/20/100).

### Storage efficiency and N-selectivity in function of temperature

The NO<sub>x</sub> storage efficiency is calculated by following formula:

$$\eta_{storage} = \frac{\int_0^{t_{ads}} (n_{NO,in} - n_{NO,out} - n_{NO_2,out}) * dt}{\int_0^{t_{ads}} (n_{NO,in}) * dt}$$

With

$$\dot{n}_i = y_i * \frac{\dot{v}_{tot}}{V_m}$$

With  $\eta_{storage}$  the NO<sub>x</sub> storage efficiency,  $\dot{n}_i$  the molar flow rate of species i [mol.s<sup>-1</sup>],  $y_i$  the gas fraction of species i,  $\dot{v}_{tot}$  total gas flow rate [L.s<sup>-1</sup>],  $V_m$  molar volume of an ideal gas at standard temperature (273.15 K) and pressure (1 atm), which is equal to 22.4 L.mol<sup>-1</sup>.

The selectivity to NH<sub>3</sub> ( $S_{NH_3}$ ), N<sub>2</sub>O ( $S_{N_2O}$ ) and N<sub>2</sub> ( $S_{N_2}$ ) can be calculated as follows. Since N<sub>2</sub> is not detectable, the selectivity can be found from the N-balance, assuming that NH<sub>3</sub>, N<sub>2</sub>O and N<sub>2</sub> are the only products.

$$S_{NH_3} = \frac{\int_{t_{0,red}}^{t_{end,red}} (n_{NH_3,out}) * dt}{n_{NOadsorbed}}$$

$$S_{N_2O} = \frac{\int_{t_{0,red}}^{t_{end,red}} (n_{N_2O,out}) * dt}{n_{NOadsorbed}}$$

$$S_{N_2} = 1 - S_{NH_3} - S_{N_2O}$$

### Section 3: Calculation of the energy cost of NOCCRA with different scenarios

Based on the N-selectivity, the amount of each N-product is calculated for producing 1 mol of NH<sub>3</sub>. Together with the stoichiometrically mols of H<sub>2</sub> needed per product, the consumed amount of H<sub>2</sub> for producing one mol of NH<sub>3</sub> is estimated.

Different scenarios are calculated with each time either different NH<sub>3</sub>-selectivity or a different energy efficiency of the electrolyser. The N<sub>2</sub>O selectivity is fixed at 1% and assuming that NH<sub>3</sub>, N<sub>2</sub>O and N<sub>2</sub> are the only products, the N<sub>2</sub> selectivity is calculated from the N-balance. The lower heating value (LHV) of H<sub>2</sub> is 119.9 MJ.kg<sup>-1</sup> or 0.2398 MJ.mol<sup>-1</sup>.

Scenario 1 takes the measured N-selectivity's at 125°C, shown in Figure 2, and with an electrolyser efficiency of 70%. Scenario 2 represents the ideal situation of 100% selectivity towards NH<sub>3</sub> and with the same electrolyser efficiency. Scenario 3 represents a 10% increase in NH<sub>3</sub>-selectivity compared to Scenario 1, and Scenario 4 a 10% increase in energy efficiency of the electrolyser compared to scenario 1.

**Table S1:** Calculation of energy cost of the NOCCRA process for different scenarios, varying the NH<sub>3</sub>-selectivity reached in the LNT, or the energy efficiency of the electrolyser

| Scenario nr. | η<br>[%] | Sel. NH <sub>3</sub><br>[%] | molH <sub>2</sub> .molNH <sub>3</sub> <sup>-1</sup> | Calculated<br>energy cost (MJ.molNH <sub>3</sub> <sup>-1</sup> ) |
|--------------|----------|-----------------------------|-----------------------------------------------------|------------------------------------------------------------------|
| 1            | 70       | 84                          | 4.369                                               | 1.50                                                             |
| 2            | 70       | 100                         | 4                                                   | 1.37                                                             |
| 3            | 70       | 94                          | 4.117                                               | 1.41                                                             |
| 4            | 80       | 84                          | 4.369                                               | 1.31                                                             |

### Section 4: Calculation numerical example

To clarify the potential of NOCCRA, a realistic implementation of NOCCRA was worked out. The characteristics of a typical industrial hydrogen combustion plant and the fertilizer demand of a typical farm was obtained from literature. The NH<sub>3</sub> selectivity was determined experimentally (**Table S2**). With these numbers, the amount of NH<sub>3</sub> produced by one industrial plant is estimated, as well as the size of cropland that could be fed with NH<sub>3</sub> by applying NOCCRA to one industrial plant.

**Table S2:** Characteristics with the used amounts and associated reference, required for calculation of a realistic implementation of the NOCCRA process

| Characteristic                       | Amount                  | Ref. |
|--------------------------------------|-------------------------|------|
| Power capacity                       | 100 kW                  | 1    |
| H <sub>2</sub> combustion efficiency | 45%                     | 2    |
| Energy content H <sub>2</sub>        | 120 MJ.kg <sup>-1</sup> | 3    |
| Flue gas NO <sub>x</sub> conc.       | 500 ppm                 | 4    |
| NH <sub>3</sub> -selectivity NOCCRA  | 84%                     | /    |
| Mass N fertilizer use/ha             | 86 kg.ha <sup>-1</sup>  | 5    |

$$\text{Inlet } H_2 \text{ flow of combustion engine} = \frac{0.100 \text{ MW}}{120 \frac{\text{MJ}}{\text{kg } H_2} * 45\%} * \frac{1000}{2 \frac{\text{g}}{\text{mol}}} = 92.6 \frac{\text{mol } H_2}{\text{s}}$$

$$\text{Flue gas flow rate} = 92.6 \frac{\text{mol } H_2}{\text{s}} * \frac{6 \text{ mol out}}{2 \text{ mol } H_2} * \frac{22.4 \frac{\text{L}}{\text{mol out}}}{1000 \frac{\text{L}}{\text{m}^3}} * 3600 \frac{\text{s}}{\text{hr}} = 22,400 \frac{\text{m}^3}{\text{hr}}$$

$$\text{NO inlet flow rate} = \frac{22,400 \frac{\text{m}^3}{\text{hr}} * 1000 \frac{\text{L}}{\text{m}^3} * 24 \frac{\text{hr}}{\text{day}}}{22.4 \frac{\text{L}}{\text{mol}}} * 500 \left( \frac{\text{mol NO}}{10^6 \text{ mol}} \right) = 6,378.3 \frac{\text{mol NO}}{\text{day}}$$

$$\text{Production rate} = 6,378.3 \frac{\text{mol NO}}{\text{day}} * 0.84 * 17 \frac{\text{g}}{\text{mol}} * \frac{365 \frac{\text{day}}{\text{year}}}{10^6} = 62.55 \frac{\text{ton } NH_3}{\text{year}}$$

$$\# \text{ ha fed by one industrial plant} = \frac{62.55 \frac{\text{ton } NH_3}{\text{year}} * 1000 \frac{\text{kg}}{\text{ton}}}{86 \frac{\text{kg}}{\text{ha}}} = 727.3 \frac{\text{ha}}{\text{year}}$$

## Reference list

1. Noroozian, R. & Asgharian, P. Microturbine Generation Power Systems. in *Distributed Generation Systems* 149–219 (Elsevier, 2017). doi:10.1016/B978-0-12-804208-3.00004-2.
2. Gaëtan Monnier, Luis Le Moyne, Cédric Philibert & Francois Kalaydjian. Hydrogen engines: an essential component in low-carbon transport. *Polytechnique insights* <https://www.polytechnique-insights.com/en/columns/energy/hydrogen-engines-an-essential-component-in-low-carbon-transport/#:~:text=Hydrogen%20engines%3A%20an%20essential%20component%20in%20low%20carbon%20transport,-On%20March%209th&text=Burning%20hydrogen%20or%20its%20derivatives,adjustments%20and%20an%20affordable%20price.> (2023).

3. Onorati, A. *et al.* The role of hydrogen for future internal combustion engines. *International Journal of Engine Research* vol. 23 529–540 Preprint at <https://doi.org/10.1177/14680874221081947> (2022).
4. Ilbas, M., Yilmaz, I. & Kaplan, Y. Investigations of hydrogen and hydrogen-hydrocarbon composite fuel combustion and NOx emission characteristics in a model combustor. *Int J Hydrogen Energy* **30**, 1139–1147 (2005).
5. University of Oxford. Fertilizer use per hectare of cropland, 2020. [https://ourworldindata.org/grapher/fertilizer-per-hectare?country=OWID\\_WRL~CHN~USA~GBR~IND~BRA~NGA~European+Union~GHA~ECU](https://ourworldindata.org/grapher/fertilizer-per-hectare?country=OWID_WRL~CHN~USA~GBR~IND~BRA~NGA~European+Union~GHA~ECU) (2019).
